# Supplementary material
Source: publisher figshare collection journal article supplement (https://acs.figshare.com/ndownloader/files/10493200)
Supplement: Supplementary file 1 [file 10493200]

## Supporting Information for

### A Super-Strong Hydrophobic Coating by Conducting A New 3D Hierarchical Architecture

Yong Seok Kim, Mingwei Shang, Shuai Kang, Jacob John Karsseboom, and Junjie Niu\*

#### Supporting Information

Figures S1-2

Table S1

Movies S1-3

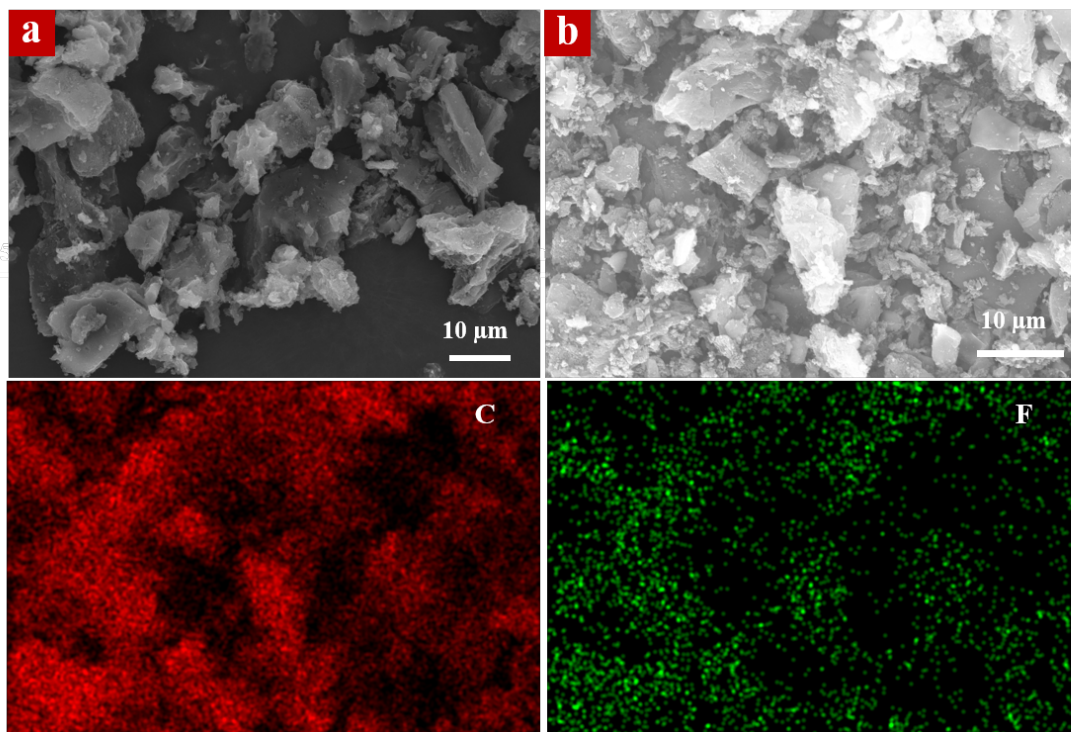

**Figure S1.** (a) SEM image of the original ACs. (b) The C and F elemental mappings of *f*-ACs using EDX.



**Movie S1.** Water droplet dances on the 3D composite coated glass.

**Movie S2.** Water droplet rolls off on the AC hybrid composite coated glass with a tilt angle of 1°.

**Movie S3.** Water droplet rolls off on the SiO<sub>2</sub> hybrid composite coated glass with a tilt angle of 1°.

## Reference

1. Lau, K. K.; Bico, J.; Teo, K. B.; Chhowalla, M.; Amaratunga, G. A.; Milne, W. I.; McKinley, G. H.; Gleason, K. K., Superhydrophobic carbon nanotube forests. *Nano letters* **2003**, 3 (12), 1701-1705.
2. Lu, Y.; Sathasivam, S.; Song, J.; Crick, C. R.; Carmalt, C. J.; Parkin, I. P., Robust self-cleaning surfaces that function when exposed to either air or oil. *Science* **2015**, 347 (6226), 1132-1135.
3. Tian, H.; Wang, F.; Ge, S.; Ou, J.; Li, W.; Yu, S., A simple and effective way to fabricate mechanical robust superhydrophobic surfaces. *RSC Advances* **2016**, 6 (34), 28563-28569.
4. Cui, S.; Lu, S.; Xu, W.; An, B.; Wu, B., Fabrication of robust gold superhydrophobic surface on iron substrate with properties of corrosion resistance, self-cleaning and mechanical durability. *Journal of Alloys and Compounds* **2017**, 728, 271-281.
5. Zhu, T.; Li, S.; Huang, J.; Mihailiasa, M.; Lai, Y., Rational design of multi-layered superhydrophobic coating on cotton fabrics for UV shielding, self-cleaning and oil-water separation. *Materials & Design* **2017**, 134, 342-351.
6. Li, H.; Yu, S., A robust superhydrophobic surface and origins of its self-cleaning properties. *Applied Surface Science* **2017**, 420, 336-345.
